# Supplementary material for: Development and external evaluation of a self-learning auto-segmentation model for Colorectal Cancer Liver Metastases Assessment (COALA)
Source: PubMed Central journal article supplement (PMC11584830; doi:10.1186/s13244-024-01820-7), 2024-11-22
Supplement: 13244_2024_1820_MOESM1_ESM.pdf [file 13244_2024_1820_MOESM1_ESM.pdf]

# Development and External Evaluation of a Self-Learning Auto-Segmentation Model for Colorectal Cancer Liver Metastases Assessment (COALA)

## ELECTRONIC SUPPLEMENTARY MATERIAL

**Table S1:** Reconstruction and acquisition parameters used to obtain the CTs.

| <b>Parameter</b>    | <b>INTERNAL dataset</b>      | <b>EXTERNAL dataset</b>   |
|---------------------|------------------------------|---------------------------|
|                     | <b>N = 373</b>               | <b>N = 50</b>             |
| Pitch/table speed   | 0.6 – 1.48 / 19.2 – 182.8 mm | 0.6 – 1.08 / 23 – 86.3 mm |
| X-Ray tube current  | 157 – 581 mA                 | 90 – 553 mA               |
| kVp                 | 90 – 120 kVp                 | 100 – 120 kVp             |
| Tube rotation speed | 0.4 – 0.75 ms                | 0.5 – 0.8 ms              |
| Slice thickness     | 3.0 – 5.0 mm                 | 3.0 mm                    |
| Width X height      | 512 – 1024 X 512 – 1024      | 512 X 512                 |
